# Supplementary material for: Rational design of hyperstable antibacterial peptides for food preservation
Source: PubMed Central journal article supplement (PMC8410836; doi:10.1038/s41538-021-00109-z), 2021-09-01
Supplement: 41538_2021_109_MOESM2_ESM.pdf [file 41538_2021_109_MOESM2_ESM.pdf]

## **Rational design of hyperstable antibacterial peptides for food preservation.**

Yashavantha L. Vishweshwaraiah<sup>†1</sup>, Abhishek Acharya<sup>†1</sup>, Vinayak Hegde<sup>1,2</sup>, Balaji Prakash<sup>1,3\*</sup>

† These authors contributed equally to the work.

<sup>1</sup> Department of Molecular Nutrition, CSIR-Central Food Technological Research Institute, Mysore 570020, India

<sup>2</sup> Academy of Scientific and Innovative Research, Ghaziabad, Uttar Pradesh, India-201002.

<sup>3</sup> Division of Biological and Life Sciences, School of Arts and Sciences, Ahmedabad University, Navrangpura, Ahmedabad – 380009. Gujarat, India.

\*To whom correspondence should be addressed: Telephone: 91-821-251-4192. Email: bprakashit@gmail.com

## Supplementary Figures

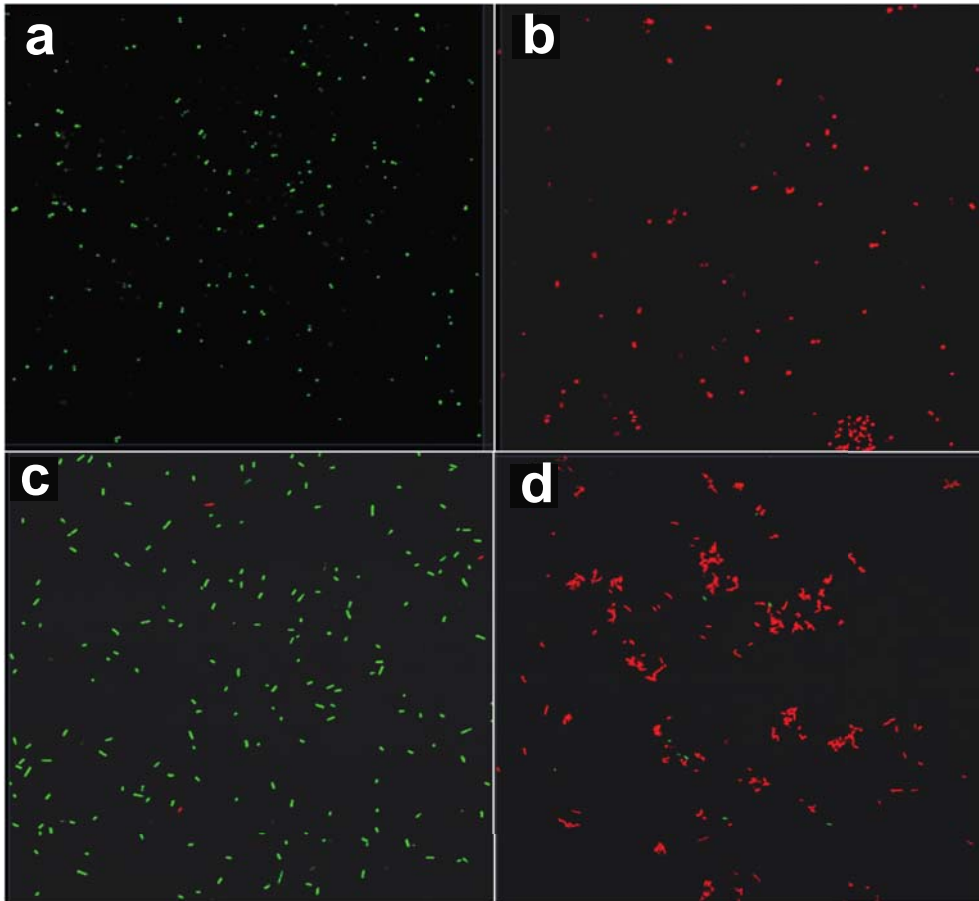

**Supplementary Figure 1. Live-dead fluorescence staining of *M. luteus* and *P. carotovorum* demonstrating the antibacterial effect of HSEP3 peptide.** Panel (a) and (c) denote control samples (no peptide added) of *M. luteus* and *P. carotovorum* cells, respectively. Panel (b) and (d) denote HSEP3-treated (at 1X MIC concentration) cells of *M. luteus*; and *P. carotovorum*, respectively. All samples have been treated with both SYTO-9 (indicates live cells) and propidium iodide (indicates dead cells) prior to imaging.

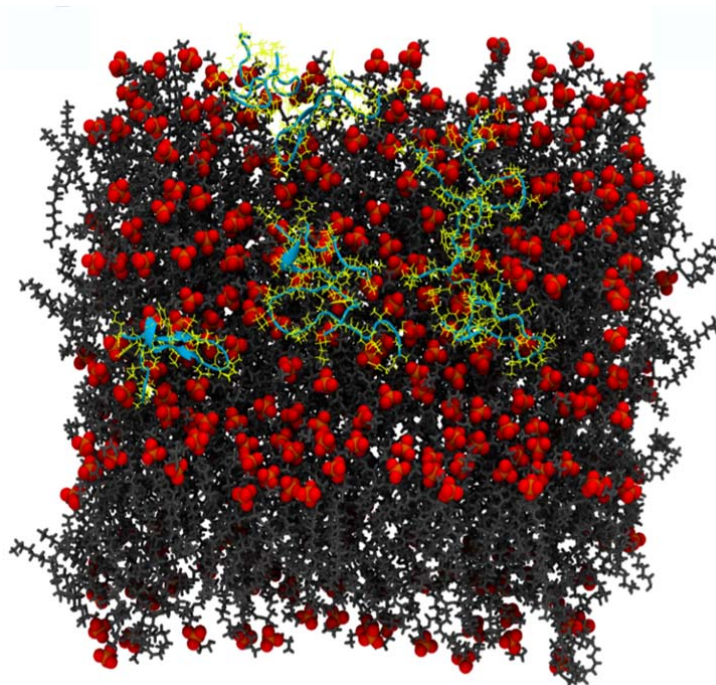

**Supplementary Figure 2. Starting frame for the peptide membrane simulations.** HSEp3 peptides simulated with 400-lipid POPE-POPG [3:1] membrane. Peptides are shown in blue bound to the top of the bilayer.

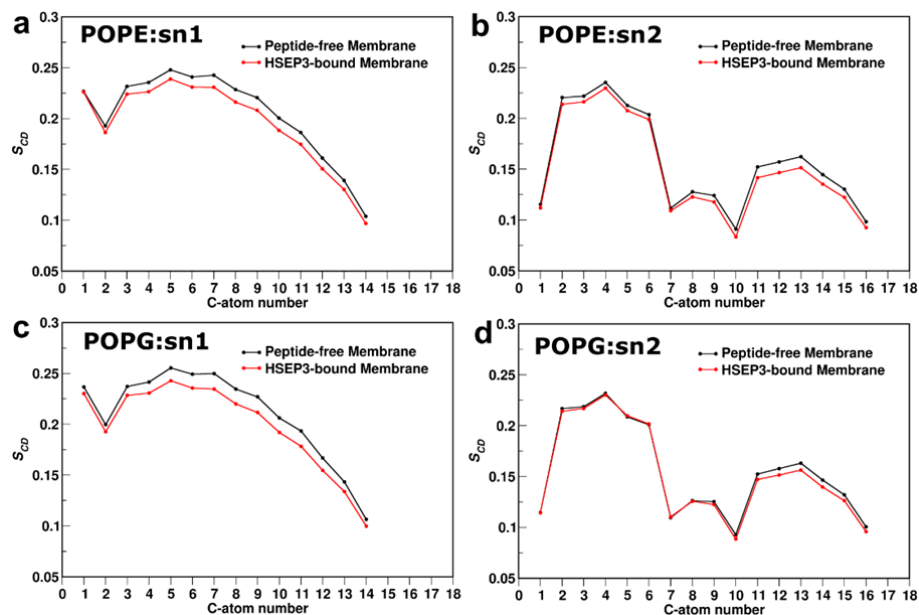

**Supplementary Figure 3. Acyl-chain deuterium order parameter ( $S_{CD}$ ) profiles calculated from peptide-free and peptide-bound membrane simulations.** Panel (a) and (c) show the order parameter profile for the *sn1*-chain (i.e. palmitoyl) of POPE and POPG, respectively, while panel (b) and (d) plot the profile for *sn2*-chain (i.e. oleoyl) of POPE and POPG, respectively. The chain parameters for peptide-free simulations have been calculated from the final 50 ns of the trajectory. Whereas for peptide-bound simulations, the last 100 ns of the trajectory were used.

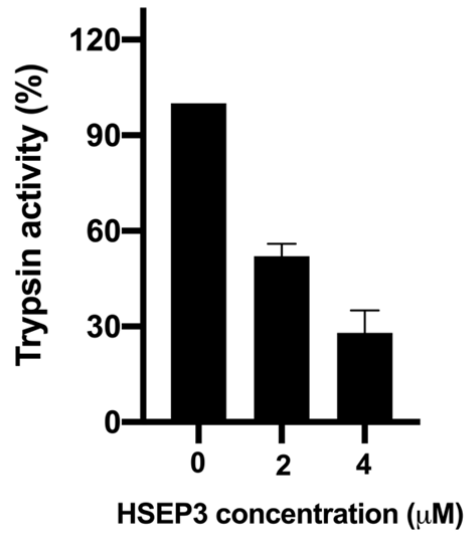

**Supplementary Figure 4. Effect of HSEP3 on the intracellular trypsin activity.** The activity is represented as percentage trypsin activity relative to the intracellular trypsin activity of the cell lysate without HSEP3. Data represent mean  $\pm$  s.e.m. of two biological replicates.

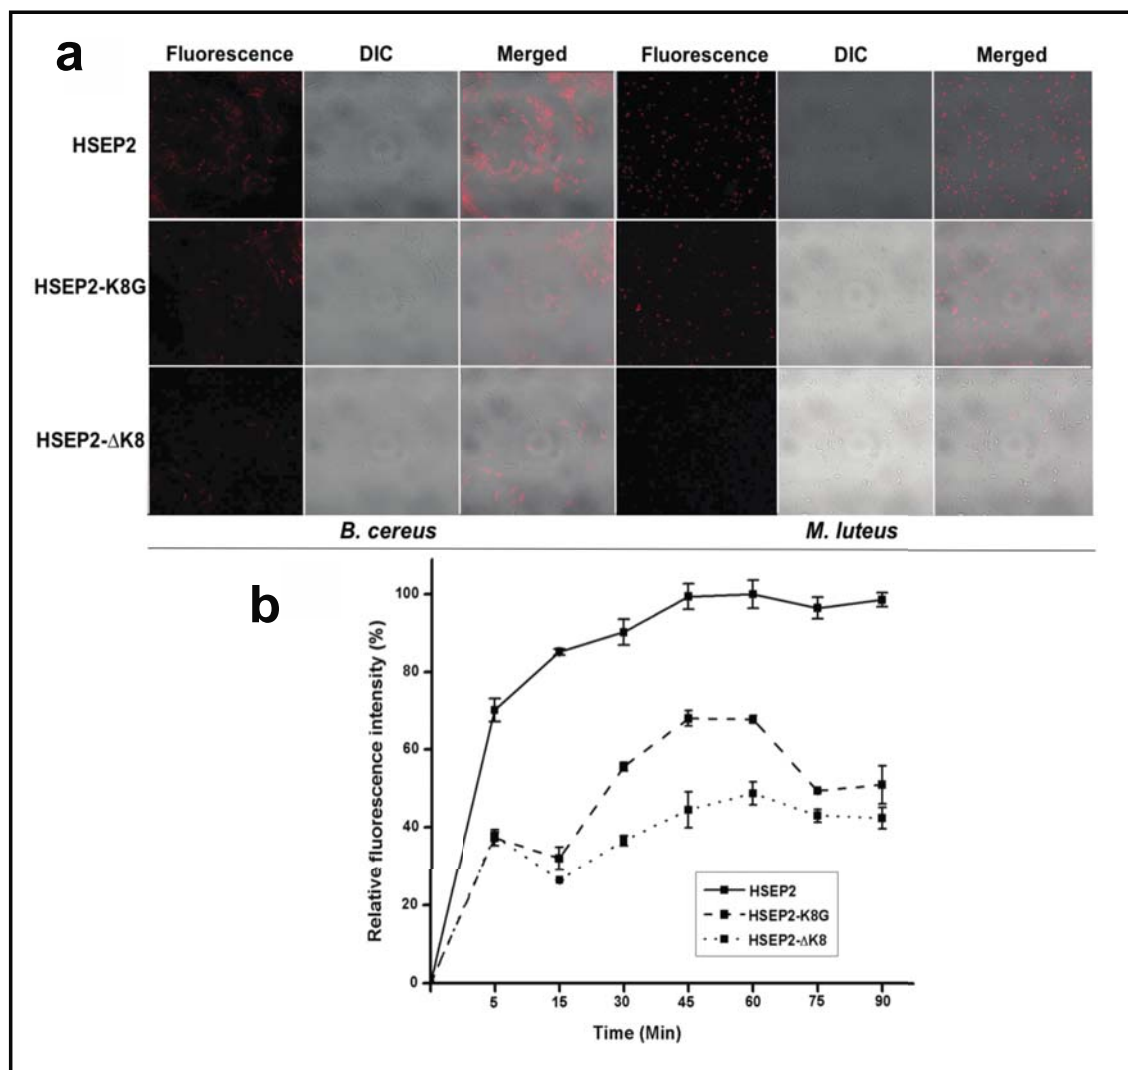

**Supplementary Figure 5. Membrane permeabilization in *B. cereus* and *M. luteus* cells treated with HSEP2 and HSEP2-mutant peptides.** (a) Confocal images of *B. cereus* and *M. luteus* cells incubated with HSEP2, HSEP2-K8G, HSEP2-ΔK8 and stained with propidium iodide. (b) Permeabilization of the cytoplasmic membrane of *M. luteus* by HSEP2, HSEP2-K8G and HSEP2-ΔK8 at 2X MIC, indicated by percent of propidium iodide fluorescence. Data represent mean  $\pm$  s.e.m. of three biological replicates.

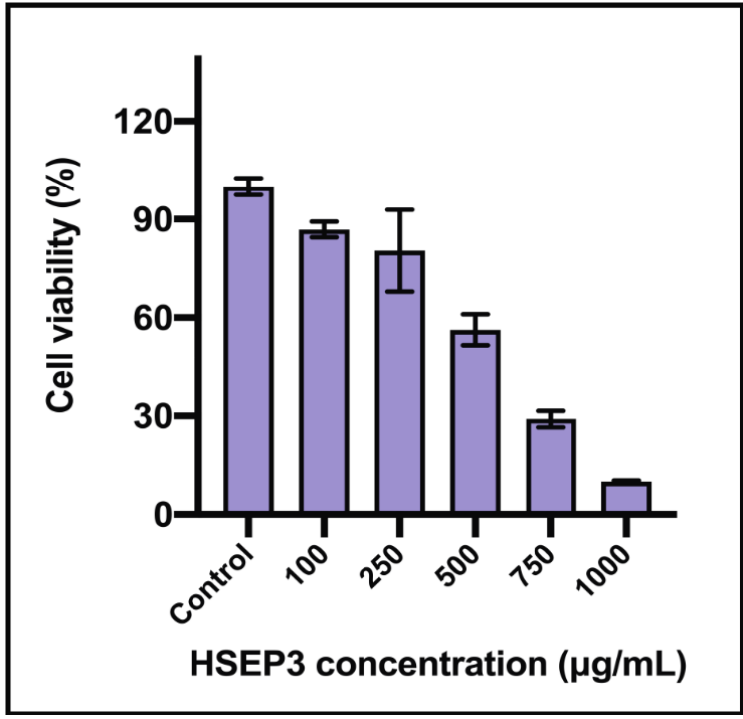

Supplementary Figure 6. Cytotoxicity of HSEP3 on human intestinal epithelial cells. Data represent mean  $\pm$  s.e.m. of three biological replicates.

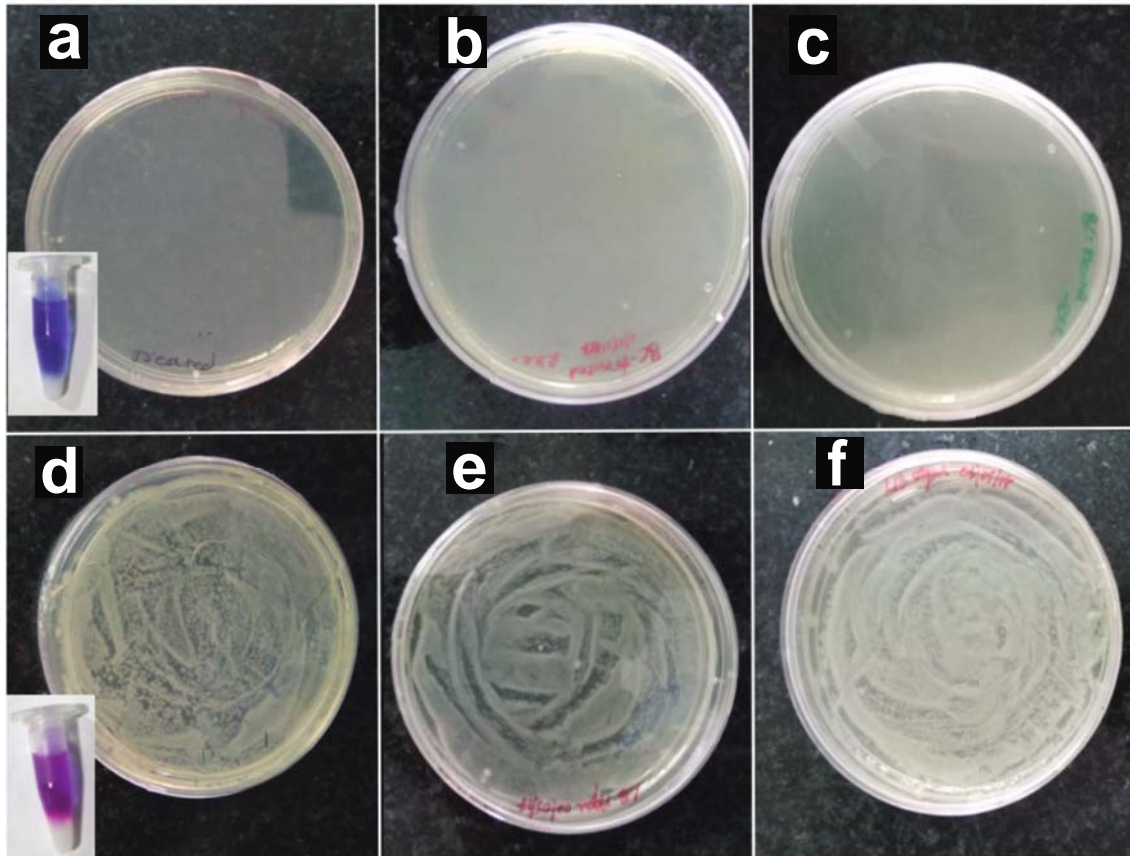

**Supplementary Figure 7. Effect of HSEP3 peptide on the growth of *B. cereus* cells on cooked rice samples, as determined by plating on LB agar media.** Panel (a), (b) and (c) show results for HSEP3-treated [2X MIC] rice samples, spiked with *B. cereus* cells, evaluated at 2, 4 and 6 days after inoculation respectively. Panel (d), (e) and (f) represent peptide untreated *B. cereus* cells evaluated in the same conditions. The inset images depict the resazurin dye test for the qualitative determination of viability of *B. cereus* cells in rice samples. The pink colored product indicates bacterial growth.

## Supplementary Tables

**Supplementary Table 1.** Membrane bilayer properties calculated from (peptide-free) membrane simulations.

| System    | No. of Lipids<br>( $N_L$ ) | Constituents           | Temp<br>[K] | APL ( $A_L$ )<br>[ $\text{\AA}^2$ ]* | Bilayer Thickness<br>( $D_{P,P}$ )<br>[nm]** | Isothermal Area<br>Compressibility<br>Modulus ( $K_A$ )<br>[mN/m] <sup>#</sup> |
|-----------|----------------------------|------------------------|-------------|--------------------------------------|----------------------------------------------|--------------------------------------------------------------------------------|
| 200-lipid | 200 (100/leaflet)          | POPE: 150 POPG:<br>50  | 315         | 59.62±1.01                           | 4.12±0.06                                    | 253.25                                                                         |
| 400-lipid | 400 (200/leaflet)          | POPE: 300 POPG:<br>100 | 315         | 59.43±0.71                           | 4.13±0.04                                    | 252.0                                                                          |
| 800-lipid | 800 (400/leaflet)          | POPE: 600 POPG:<br>100 | 315         | 59.76±0.49                           | 4.12±0.03                                    | 23.1                                                                           |

\* Previously reported value for area-per-lipid of POPE-POPG bilayer: 58.3  $\text{\AA}^2$  [Hong et al. 2014]; 61.5  $\text{\AA}^2$  [Rog et al. 2003].

\*\* Previously reported values for bilayer thickness ( $D_{P,P}$ ): 4.01±0.01 nm [Pandit et al. 2012].

<sup>#</sup> The experimental range for Isothermal Area Compressibility Modulus values for bilayer is 180-330 mN/m. Previously reported value of  $K_A$  for POPE-POPG simulations is 0.25±0.04 N/m [Pandit et al 2012].

**Supplementary Table 2.** MICs of HSEP3 and Nisin against *B. cereus*.

| Antibacterial activity against <i>B. cereus</i> |       | Inhibition of <i>B. cereus</i> spore germination |       | Effect of steam heat on antibacterial activity (in complex media) |       | Effect of steam heat on antibacterial activity (in MH media) |       | Effect of dry heat on antibacterial activity |       |
|-------------------------------------------------|-------|--------------------------------------------------|-------|-------------------------------------------------------------------|-------|--------------------------------------------------------------|-------|----------------------------------------------|-------|
| HSEP3                                           | Nisin | HSEP3                                            | Nisin | HSEP3                                                             | Nisin | HSEP3                                                        | Nisin | HSEP3                                        | Nisin |
| 12.5                                            | 50    | 12.5                                             | 200   | 50                                                                | ND    | 12.5                                                         | 100   | 12.5                                         | 100   |

All values are in  $\mu\text{g/mL}$ . ND not detected

## Supplementary References

- Hong, C., Tieleman, D. P. & Wang, Y. Microsecond molecular dynamics simulations of lipid mixing. *Langmuir* **30**, 11993–12001 (2014).
- T, R., K, M. & M, P.-G. Molecular dynamics simulations of charged and neutral lipid bilayers: treatment of electrostatic interactions. *Acta Biochim. Pol.* **50**, 789–798 (2003).
- Pandit, K. R. & Klauda, J. B. Membrane models of *E. coli* containing cyclic moieties in the



aliphatic lipid chain. *Biochim. Biophys. Acta - Biomembr.* **1818**, 1205–1210 (2012).
